# Supplementary material for: Zirconia incorporated calcium looping absorbents with superior sintering resistance for carbon dioxide capture from in situ or ex situ processes
Source: Royal Society of Chemistry journal article supplement (doi:10.1039/c8se00413g), 2018-01-01
Supplement: c8se00413g1.pdf [file c8se00413g1.pdf]

**Supplementary Information for**  
**Zirconia Incorporated Calcium Looping Absorbents with**  
**Superior Sintering Resistance for Carbon Dioxide**  
**Capture from *In-situ* or *Ex-situ* Processes**

---

Ming Zhao <sup>a, b</sup>, Xu He <sup>a, b</sup>, Guozhao Ji <sup>a, b</sup>, Yinqiang Song <sup>a, b</sup>, Xiao Zhao <sup>\*, a, c</sup>

<sup>a</sup> School of Environment, Tsinghua University, Beijing, 100084, China.

<sup>b</sup> Key Laboratory for Solid Waste Management and Environmental Safety, Ministry of Education Beijing 100084, China.

<sup>c</sup> College of Water Resources & Civil Engineering, China Agricultural University, Beijing 100083, China.

\*Corresponding Author. Tel: +86 10 62784701. Email: xiaozhao88@cau.edu.cn

**Table S1.** Crystallite sizes of CaO and CaZrO<sub>3</sub> of some samples.

| Sample  | CaO (nm) |       | CaZrO <sub>3</sub> |
|---------|----------|-------|--------------------|
|         | (200)    | (220) | (202)              |
| SD-CaO  | >100     | >100  | -                  |
| SD-Zr10 | 57.3     | 54.1  | 25.5               |
| SD-Zr20 | 54.6     | 52.2  | 26.1               |
| SD-Zr30 | 46.9     | 45.7  | 26.7               |
| FD-Zr20 | 53.6     | 53.7  | 22.0               |
| HD-Zr20 | 51.5     | 52.0  | 24.7               |

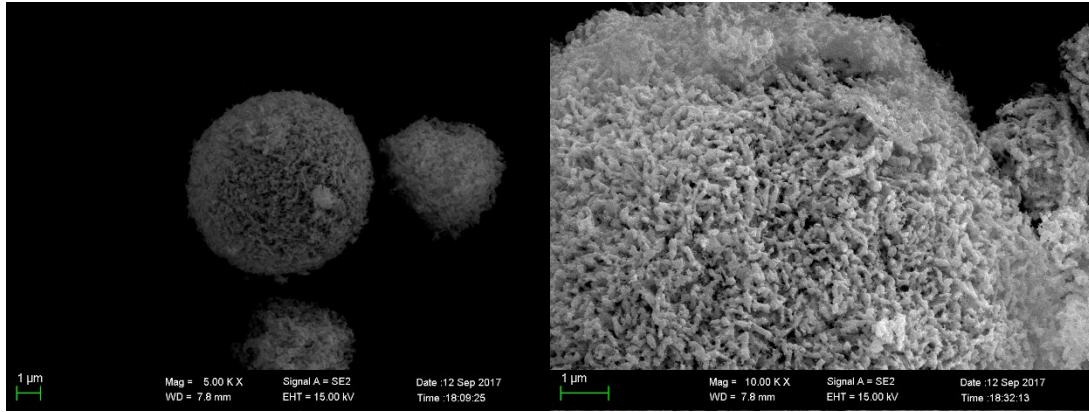

**Fig. S1.** Sphere structure of SD-Zr<sub>20</sub>.

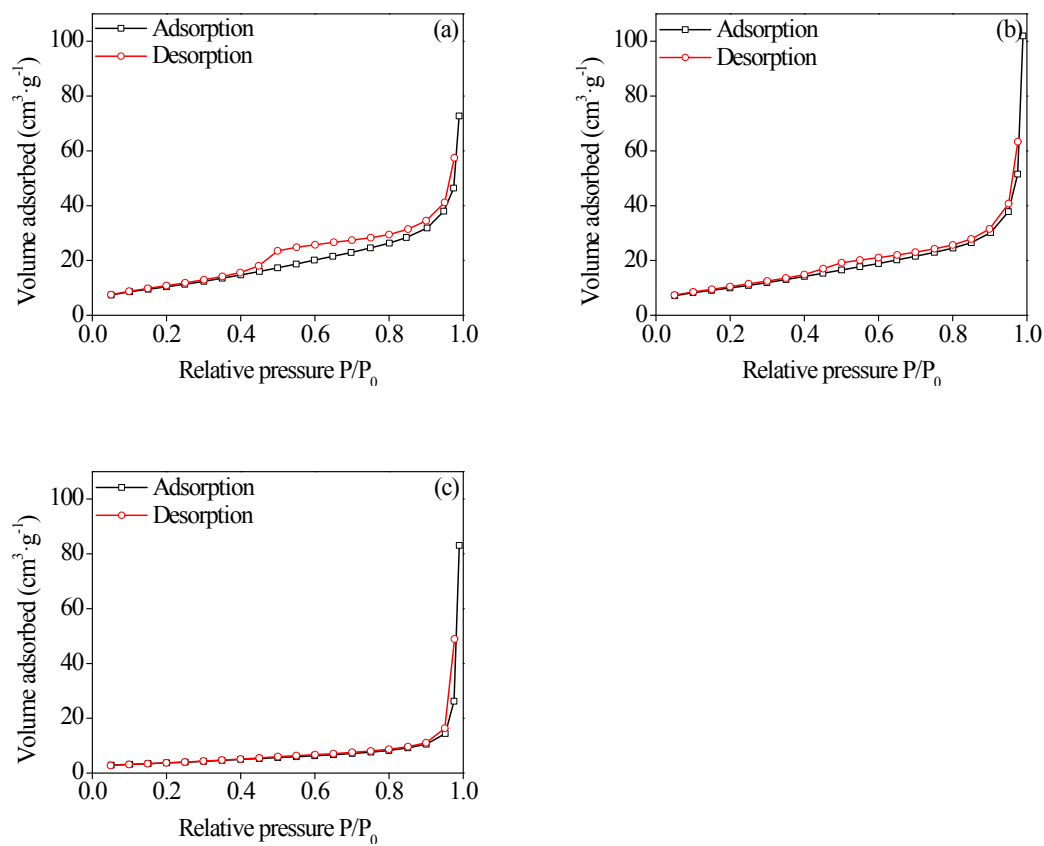

**Fig. S2.** The N<sub>2</sub> physi-sorption isotherms of (a) FD-Zr<sub>20</sub>, (b) SD-Zr<sub>20</sub> and (c) HD-Zr<sub>20</sub>.

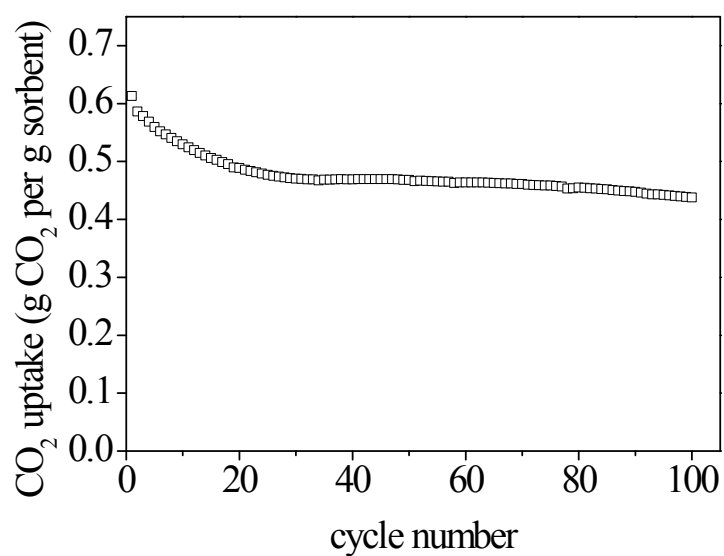

**Fig. S3.** The CO<sub>2</sub> uptake of SD-Zr20 over the 100 cycles under severe conditions (carbonation in 90 vol.% CO<sub>2</sub> at 650 °C for 10 min and calcination in 90 vol.% CO<sub>2</sub> at 950 °C with no dwell time).

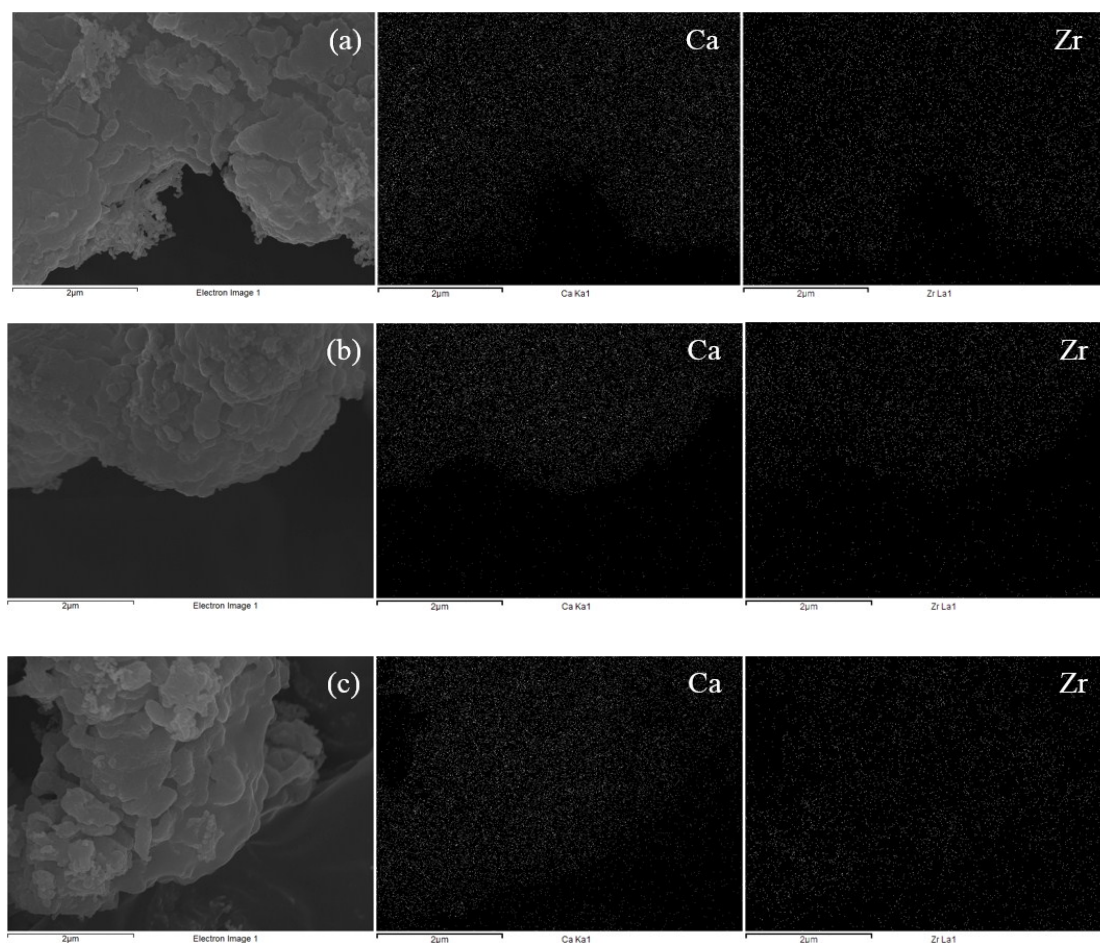

**Fig. S4.** EDS figures of FD-Zr20 (a), SD-Zr20 (b) and HD-Zr20 (c) after cycles under severe conditions.
